# Supplementary material
Source: Springer Nature journal article supplement (https://www.springermedizin.de/resource/supplementary/13024_2009_84_MOESM2_ESM.pdf/9643348)

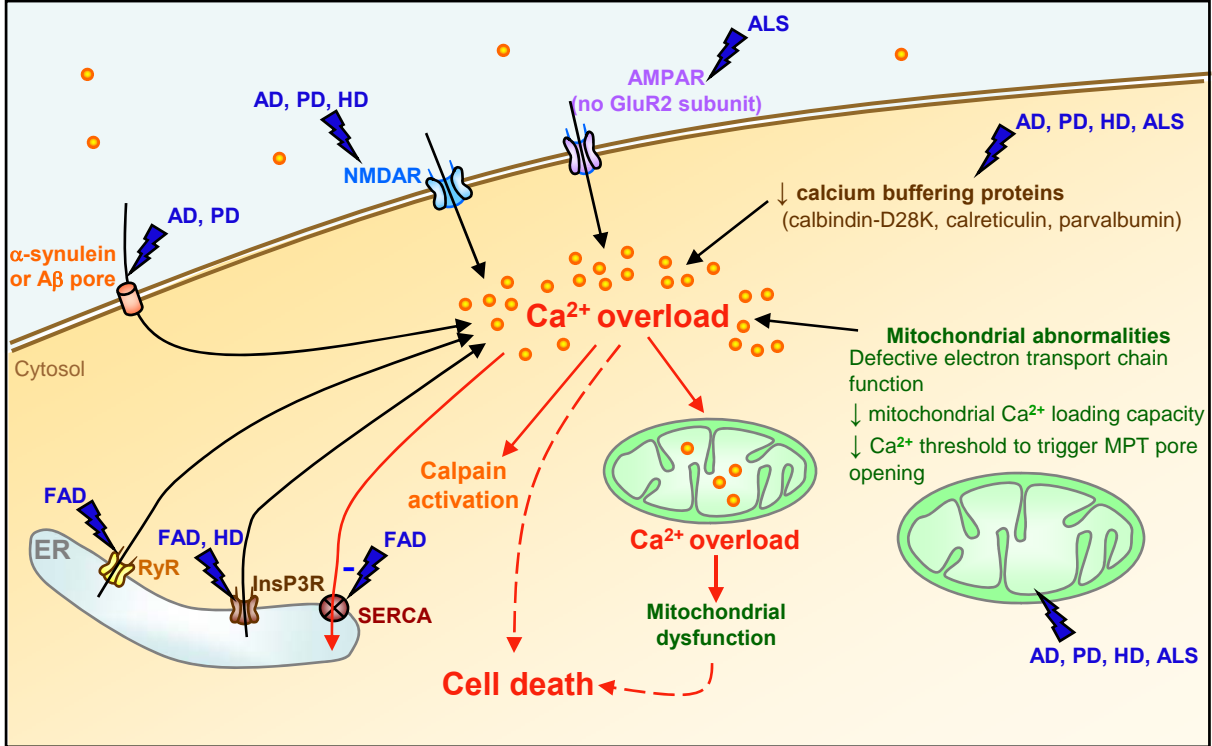

Supplement: MOESM2 [file 9643348]
